# Supplementary material for: PARP1 recruits DNA translocases to restrain DNA replication and facilitate DNA repair
Source: PubMed Central journal article supplement (PMC9794062; doi:10.1371/journal.pgen.1010545), 2022-12-13
Supplement: pgen.1010545.s022.pdf [file pgen.1010545.s022.pdf]

**Table S1. The list of targeting sequences of shRNA used in this study.**

| <b>Gene Symbol</b> | <b>Target sequence</b>      | <b>Clone ID</b> |
|--------------------|-----------------------------|-----------------|
| LacZ               | CGC GAT CGT AAT CAC CCG AGT | TRCN0000231722  |
| PARP1              | TTT GGT AAA GGG ATC TAT TTC | TRCN0000390913  |
| HLTF               | GCA GGT GGA GTT GGT TTG AAT | TRCN0000272618  |
| SHPRH              | ACG GAA CCA GAA GCG CTA TAT | TRCN0000235922  |
| SMARCAL1           | AGG TGT TGA TTG GGT ACA ATG | TRCN0000236116  |
| SMARCAL1           | CCA CAG TCC ACG TAG TCA AAT | TRCN0000236114  |
