# Supplementary material for: PARP1 recruits DNA translocases to restrain DNA replication and facilitate DNA repair
Source: PubMed Central journal article supplement (PMC9794062; doi:10.1371/journal.pgen.1010545), 2022-12-13
Supplement: pgen.1010545.s023.pdf [file pgen.1010545.s023.pdf]

**Table S2. The list of antibodies used in this study.**

| antibodies                               | WB Dilute concentration | PLA Dilute concentration | Catalog number  | Source                   |
|------------------------------------------|-------------------------|--------------------------|-----------------|--------------------------|
| Rabbit polyclonal anti-HLTF              | 1:5000                  | 1:100                    | Cat#A300-230A   | Bethyl Laboratories      |
| Rabbit polyclonal anti-SHPRH             | 1:1000                  | 1:100                    | ab80129         | abcam                    |
| Rabbit polyclonal anti-ZRANB3            | 1:2000                  | 1:100                    | Cat#A303-033A   | Bethyl Laboratories      |
| Rabbit polyclonal anti-ZRANB3            | 1:2000                  | 1:50                     | PA5-65143       | Invitrogen               |
| Rabbit polyclonal anti-SMARCAL1          | 1:2000                  | 1:100                    | Cat#A301-616A   | Bethyl Laboratories      |
| Mouse monoclonal anti-PARP1              | 1:2000                  | 1:50                     | 556494          | BD Pharmingen            |
| Rabbit polyclonal anti-phospho-Chk2      | 1:1000                  |                          | #2661           | cell signaling           |
| Rabbit monoclonal anti-Chk2              | 1:500                   |                          | #6334           | cell signaling           |
| Rabbit monoclonal anti-phospho-Chk1      | 1:1000                  |                          | #2348           | cell signaling           |
| Mouse monoclonal anti-Chk1               | 1:500                   |                          | sc-8408         | Santa Cruz Biotechnology |
| Rabbit polyclonal anti-H2AX              | 1:2000                  |                          | ab124781        | abcam                    |
| Mouse monoclonal anti- $\gamma$ H2AX     | 1:2000                  |                          | Cat#05-636      | Millipore                |
| Mouse monoclonal anti- $\alpha$ -tubulin | 1:5000                  |                          | GTX628802-01    | Genetex                  |
| Rabbit polyclonal anti-53BP1             |                         |                          | ab36823         | abcam                    |
| Mouse monoclonal anti-biotin (PLA)       |                         | 1:2000                   | Cat#200-002-211 | Jackson ImmunoResearch   |
| Rabbit polyclonal anti-biotin (PLA)      |                         | 1:3000                   | Cat#A150-109A   | Bethyl Laboratories      |
|                                          |                         |                          |                 |                          |
|                                          |                         |                          |                 |                          |
|                                          |                         |                          |                 |                          |
